# Supplementary material
Source: PubMed Central journal article supplement (PMC5160013)
Supplement: NIHMS833077-supplement-SI.pdf [file NIHMS833077-supplement-SI.pdf]

## Supporting Information for

# Utilizing viral nanoparticle/dendron hybrid conjugates in photodynamic therapy for dual delivery to macrophages and cancer cells

Amy M. Wen<sup>1</sup>, Pengfei Cao<sup>2</sup>, Karin L. Lee<sup>1</sup>, Katrina Pangilinan<sup>2</sup>, Bradley L. Carpenter<sup>3</sup>, Reza A. Ghiladi<sup>3</sup>, Rigoberto C. Advincula<sup>2</sup>, Nicole F. Steinmetz<sup>1,2,4,5,6\*</sup>

<sup>1</sup>Department of Biomedical Engineering, Case Western Reserve University, Cleveland, OH 44106.

<sup>2</sup>Department of Macromolecular Science and Engineering, Case Western Reserve University, Cleveland, OH 44106.

<sup>3</sup>Department of Chemistry, North Carolina State University, Raleigh, NC 27695

<sup>4</sup>Department of Radiology, Case Western Reserve University, Cleveland, OH 44106.

<sup>5</sup>Department of Materials Science and Engineering, Case Western Reserve University, Cleveland, OH 44106.

<sup>6</sup>Case Comprehensive Cancer Center, Case Western Reserve University, Cleveland, OH 44106.

**Corresponding Author: \*[nicole.steinmetz@case.edu](mailto:nicole.steinmetz@case.edu)**

## Table of Contents

|                                                          |   |
|----------------------------------------------------------|---|
| <b>Figure S1.</b> NMR spectrum of carboxyl dendron ..... | 2 |
|----------------------------------------------------------|---|

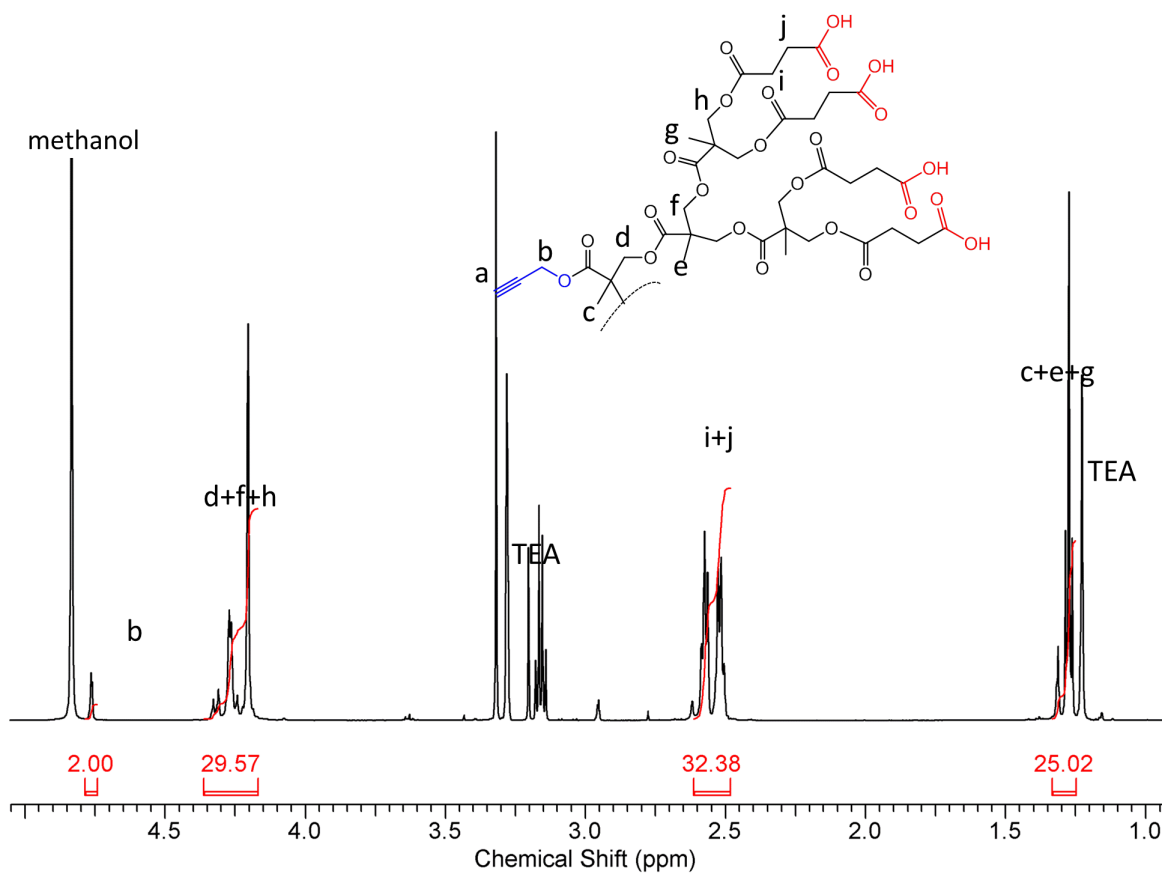

**Figure S1.** NMR spectrum of carboxyl dendron. The <sup>1</sup>H NMR spectrum was acquired at 600 MHz (Varian Inova) using deuterated methanol. Based on relative peak integration, complete attachment of carboxyl groups to the dendrons was achieved (expected ratio of i+j to b is 32:2).
